# Supplementary material for: Automated Quantification of Extranuclear ERα Using Phosphor-Integrated Dots for Predicting Endocrine Therapy Resistance in HR+/HER2− Breast Cancer
Source: PubMed Central journal article supplement (PMC6520781; doi:10.3390/cancers11040526), 2019-04-12
Supplement: cancers-11-00526-s001.pdf [file cancers-11-00526-s001.pdf]

1 **Supplementary Material: Automated quantification**  
 2 **of extranuclear ER $\alpha$  using phosphor-integrated dots**  
 3 **for predicting endocrine therapy resistance in**  
 4 **HR+/HER2- breast cancer**

5 Zhaorong Guo, Hiroshi Tada, Narufumi Kitamura, Yoh Hamada, Minoru Miyashita, Narumi  
 6 Harada, Akiko Sato, Yohei Hamanaka, Kouki Tsuboi, Nobuhisa Harada, Mayumi Takano-  
 7 Kasuya, Hisatake Okada, Yasushi Nakano, Noriaki Ohuchi, Shin-ichi Hayashi, Takanori Ishida<sup>1</sup>  
 8 Kohsuke Gonda

9

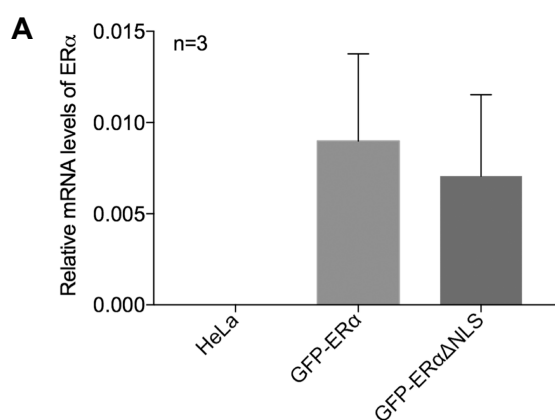

10

11 **Figure S1.** Verification of transfection with GFP-ER $\alpha$  or GFP-ER $\alpha$ ΔNLS expression plasmids. Relative  
 12 copy number of ER $\alpha$  mRNA expression level for HeLa cells, GFP-ER $\alpha$  plasmids-transfected HeLa  
 13 cells, GFP-ER $\alpha$ ΔNLS plasmids-transfected HeLa cells.

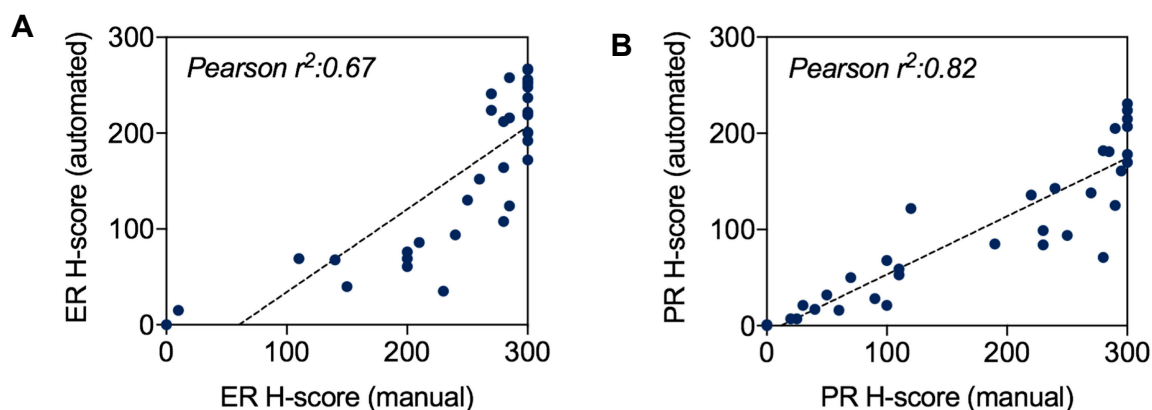

14

15 **Figure S2.** H-scores for the assessment of ER and PR are highly reproducible. The H-scores of  
 16 randomly selected 34 cases were assessed with the Aperio image analysis system, which has a strong  
 17 correlation with manual scoring evaluation by an expert pathologist. Pearson coefficients  $r^2=0.67$  (ER,  
 18 A) and  $0.82$  (PR, B).

19

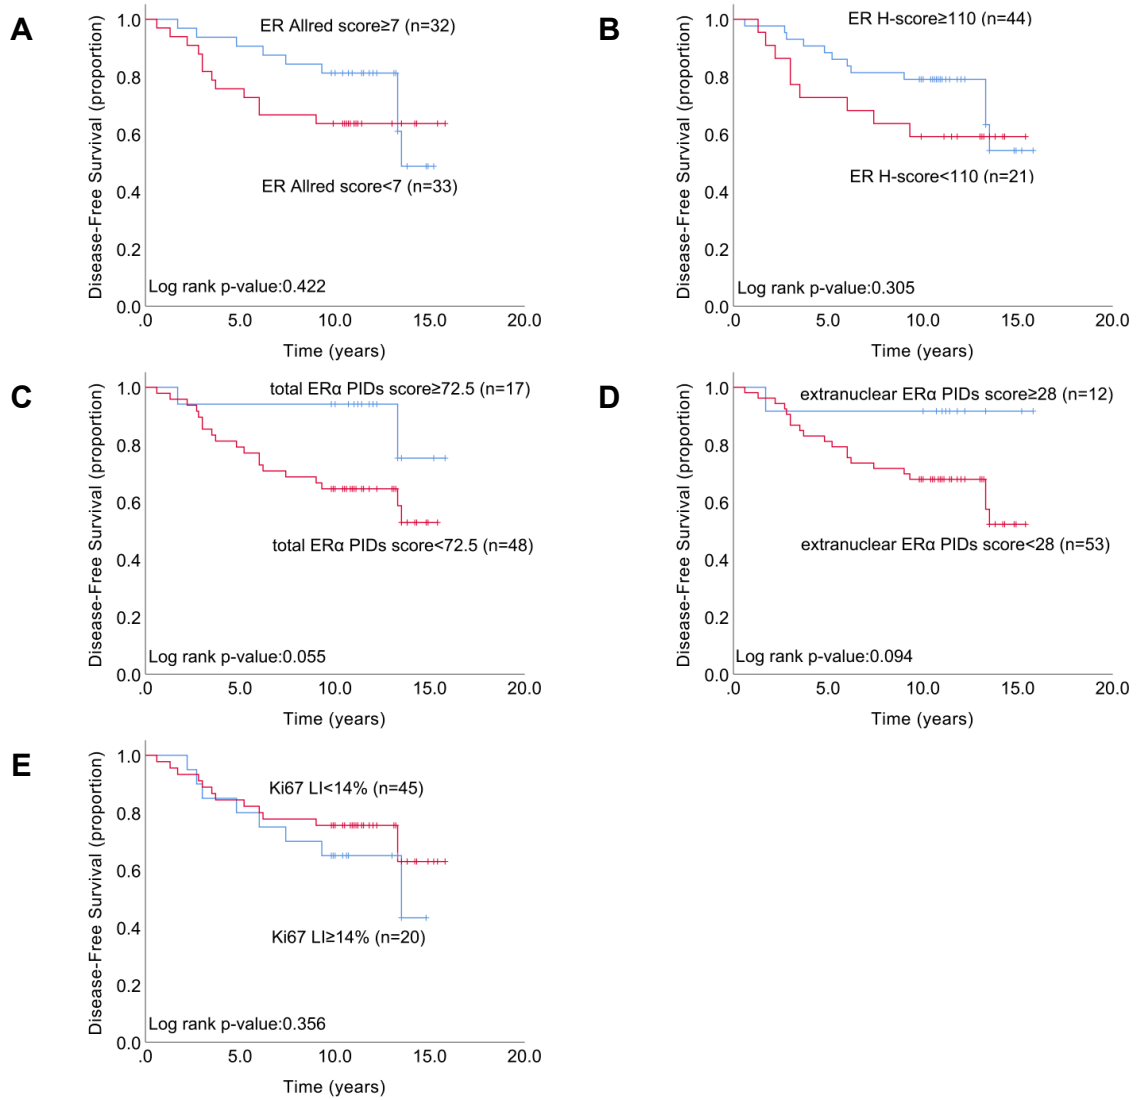

20

21 **Figure S3.** Kaplan-Meier analysis of DFS according to ERα expression. Kaplan-Meier analysis of DFS  
 22 according to the cut-off values of the ER Allred score(A), ER H-score (B), total ERα PID score (C),  
 23 extranuclear ERα PID score (D), Ki67 LI (E). P values were determined with the log-rank test.

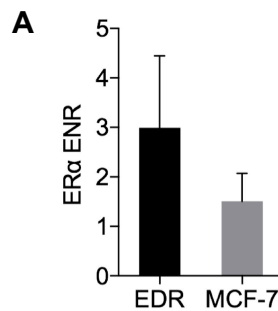

24

25 **Figure S4 A** A comparison of ENR between EDR (estrogen-deprivation-resistant) cell and MCF-7 cell  
 26 ( $p= 0.066$ )

27

28

29

**Supplementary Table S1. Associations between ER $\alpha$  ENR expression and clinicopathological**

| Characteristics           | No. (%) of Patients        |                                   | <i>P</i> value |
|---------------------------|----------------------------|-----------------------------------|----------------|
|                           | ER $\alpha$ ENR<0.5 (n=30) | ER $\alpha$ ENR $\geq$ 0.5 (n=35) |                |
| <b>Menopausal status</b>  |                            |                                   |                |
| pre                       | 7 (11)                     | 21 (32)                           | 0.673          |
| post                      | 11 (17)                    | 26 (40)                           |                |
| <b>Lymph node status</b>  |                            |                                   |                |
| N0                        | 12 (18)                    | 26 (40)                           | 0.406          |
| N $\geq$ 1                | 6 (9)                      | 21 (32)                           |                |
| <b>Stage</b>              |                            |                                   |                |
| I                         | 9 (14)                     | 20 (31)                           | 0.674          |
| II                        | 8 (12)                     | 21 (32)                           |                |
| III                       | 1 (2)                      | 6 (9)                             |                |
| <b>Histological grade</b> |                            |                                   |                |
| 1                         | 6 (9)                      | 14 (22)                           | 0.961          |
| 2                         | 9 (14)                     | 25 (38)                           |                |
| 3                         | 3 (5)                      | 8 (12)                            |                |
| <b>Ki67 LI (%)</b>        |                            |                                   |                |
| <14                       | 13 (20)                    | 32 (49)                           | 0.746          |
| $\geq$ 14                 | 5 (8)                      | 15 (23)                           |                |
| <b>ER H-score</b>         |                            |                                   |                |
| <110                      | 2 (3)                      | 20 (31)                           | 0.017          |
| $\geq$ 110                | 16 (25)                    | 27 (41)                           |                |
| <b>PR H-score</b>         |                            |                                   |                |
| <100                      | 11 (17)                    | 25 (38)                           | 0.565          |
| $\geq$ 100                | 7 (11)                     | 22 (34)                           |                |

30

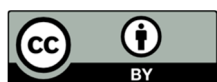

© 2019 by the authors. Submitted for possible open access publication under the terms and conditions of the Creative Commons Attribution (CC BY) license (<http://creativecommons.org/licenses/by/4.0/>).

31
